# Supplementary material for: Quick validation of genetic quality for conditional alleles in mice
Source: PubMed Central journal article supplement — Genes Cells. 2021 Feb 26;26(4):240–5. doi: 10.1111/gtc.12834 (PMC8247991; doi:10.1111/gtc.12834), 2021-02-26
Supplement: GTC-26-240-s001.pdf [file GTC-26-240-s001.pdf]

Fig. S1

### Detection of each *loxP* or *FRT* with universal and genomic primers

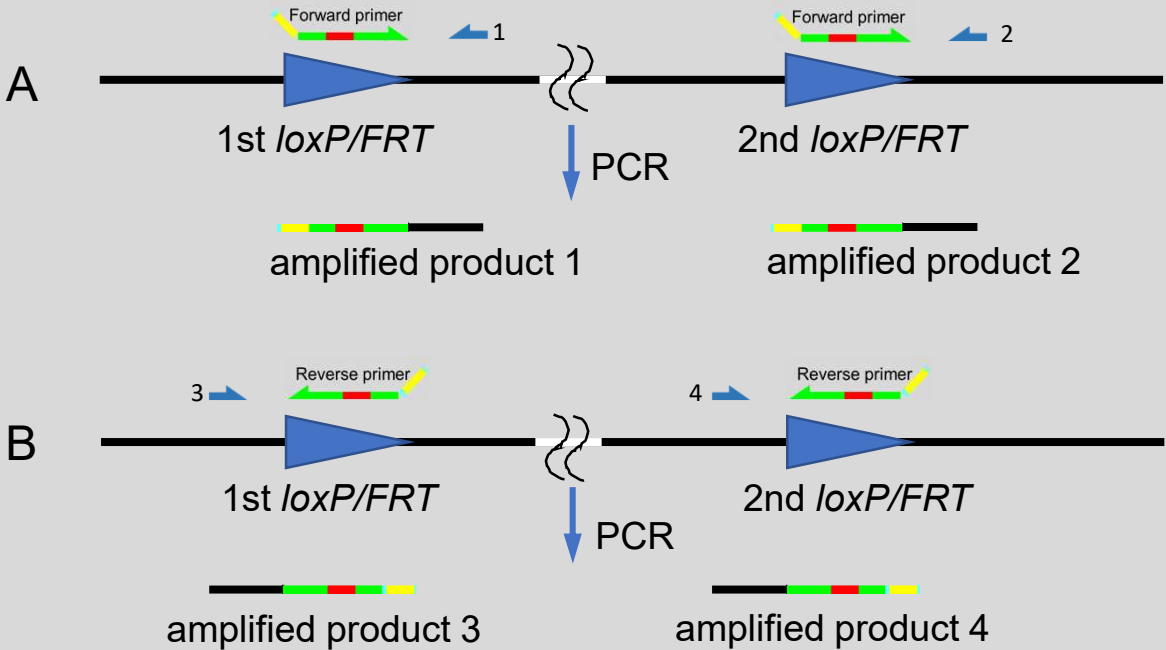

Fig. S1. Detection of each *loxP* or *FRT* with universal primers and genomic primers. A: The forward *loxP*- or *FRT*-primers can be used in combination with specific downstream genomic primers 1 and 2 to examine the orientation and genomic location of each *loxP* or *FRT* site. B: The reverse *loxP*- or *FRT*-primers can be used in combination with specific upstream genomic primers 3 and 4 to examine the orientation and genomic location of each *loxP* or *FRT*.
