# Supplementary material for: Quick validation of genetic quality for conditional alleles in mice
Source: PubMed Central journal article supplement — Genes Cells. 2021 Feb 26;26(4):240–5. doi: 10.1111/gtc.12834 (PMC8247991; doi:10.1111/gtc.12834), 2021-02-26
Supplement: GTC-26-240-s002.pdf [file GTC-26-240-s002.pdf]

**Table S1. Practicality of the *loxP* and *FRT* universal primers for testing of conditional alleles**

| Serial No. | BRC_No | Strain_name                                               | Expected No. of |            | Detected fragment size (kb) |                     | No. of DNA samples |                       |                           | Detection of each <i>loxP</i> or <i>FRT</i> with universal and genomic primers** |                 |                 |                |                |
|------------|--------|-----------------------------------------------------------|-----------------|------------|-----------------------------|---------------------|--------------------|-----------------------|---------------------------|----------------------------------------------------------------------------------|-----------------|-----------------|----------------|----------------|
|            |        |                                                           | <i>loxP</i>     | <i>FRT</i> | by <i>loxP</i> -test        | by <i>FRT</i> -test | Tested             | successfully detected | not successfully detected | 1st <i>loxP</i>                                                                  | 2nd <i>loxP</i> | 3rd <i>loxP</i> | 1st <i>FRT</i> | 2nd <i>FRT</i> |
| 1          | 09446  | C57BL/6-Isrl<tm1a(EUCOMM)Wtsi>/Ea                         | 3               | 2          | 4.0, 2.0, 1.8               | 7.0                 | 2                  | 1                     | 1                         | N.T.                                                                             | N.T.            | N.T.            | Confirmed      | Confirmed      |
| 2          | 05631  | C57BL/6N-Nin<tm1a(EUCOMM)Hmgu>/B10                        | 3               | 2          | 2.8, 2, 0.8                 | 7.0                 | 1                  | 1                     | 0                         | Confirmed                                                                        | Confirmed       | Confirmed       | N.T.           | N.T.           |
| 3          | 05619  | C57BL/6N-Ube3c<tm1a(EUCOMM)Hmgu>/B01                      | 3               | 2          | 2.9, 1.9, 1.0               | 7.0                 | 3                  | 2                     | 1                         | Confirmed                                                                        | Confirmed       | Confirmed       | Confirmed      | Confirmed      |
| 4          | 06270  | C57BL/6N-Tgm3<tm1a(KOMP)Wtsi>/B12                         | 3               | 2          | 2.8, 2, 0.8                 | 7.0                 | 3                  | 3                     | 0                         | Confirmed                                                                        | Confirmed       | Confirmed       | Confirmed      | Confirmed      |
| 5          | 05903  | C57BL/6N-Gal<tm1a(KOMP)Wtsi>/G08                          | 3               | 2          | 2.6, 1.9, 0.7               | 7.0                 | 3                  | 3                     | 0                         | N.T.                                                                             | Confirmed       | Confirmed       | N.T.           | N.T.           |
| 6          | 05780  | C57BL/6N-Rufy3<tm1a(EUCOMM)Hmgu>/B08                      | 3               | 2          | 3.0, 2.0, 1.1               | 7.0                 | 4                  | 4                     | 0                         | N.T.                                                                             | Confirmed       | N.T.            | N.T.           | N.T.           |
| 7          | 09810  | B6.Cg-PcdhaCRex1_c.5-18del(-14)_Pcdhg<tm(CRex1)>/TyagRbrc | 3               | 1          | 0.9, 0.6, 0.4               | N.D.                | 2                  | 2                     | 0                         | Confirmed                                                                        | Confirmed       | Confirmed       | Confirmed      | N.T.           |
| 8          | 06493  | ICR.Cg-Hes1<tm1(venus)Imayo>                              | 3               | 0          | 4.0, 2.2, 1.5               | N.D.                | 2                  | 2                     | 0                         | Confirmed                                                                        | Confirmed       | Confirmed       | N.T.           | N.T.           |
| 9          | 09391  | B6;129-Rapgef4<tm1Sse>                                    | 3               | 0          | 2.8, 1.4*                   | N.D.                | 4                  | 4                     | 0                         | Confirmed                                                                        | Confirmed       | Confirmed       | N.T.           | N.T.           |
| 10         | 09255  | C.Cg-Gt(ROSA)26Sor<tm1(CAG-kikGR)Kgwa>                    | 3               | 0          | 2.5*, 0.3                   | N.D.                | 5                  | 5                     | 0                         | N.T.                                                                             | Confirmed       | N.T.            | N.T.           | N.T.           |
| 11         | 04874  | C57BL/6N-Gt(ROSA)26Sor<tm1(CAG-EGFP/tDsRed)Utr>/Rbrc      | 2               | 2          | 1.0                         | 1.8                 | 2                  | 2                     | 0                         | N.T.                                                                             | N.T.            | N.T.            | N.T.           | N.T.           |
| 12         | 05681  | C57BL/6N-Penk<tm1(KOMP)Mbp>/G01                           | 2               | 2          | 1.9                         | 7.0                 | 2                  | 2                     | 0                         | N.T.                                                                             | N.T.            | N.T.            | N.T.           | N.T.           |
| 13         | 05850  | B6.Cg-Flg<tm1Amag>/Rbrc                                   | 2               | 2          | 1.6                         | 1.6                 | 4                  | 4                     | 0                         | N.T.                                                                             | N.T.            | N.T.            | N.T.           | N.T.           |
| 14         | 05851  | C.Cg-Flg<tm1>                                             | 2               | 2          | 1.6                         | 1.6                 | 2                  | 2                     | 0                         | N.T.                                                                             | N.T.            | N.T.            | N.T.           | N.T.           |
| 15         | 06583  | C57BL/6-Tg(Gt(ROSA)26Sor-eNpHR3/EYFP)1Imayo               | 2               | 2          | 2.7                         | 1.1                 | 2                  | 2                     | 0                         | N.T.                                                                             | N.T.            | N.T.            | N.T.           | N.T.           |
| 16         | 06585  | C57BL/6-Tg(Gt(ROSA)26Sor-ArchT/EGFP)1Imayo                | 2               | 2          | 2.5                         | 1.2                 | 8                  | 8                     | 0                         | N.T.                                                                             | N.T.            | N.T.            | N.T.           | N.T.           |
| 17         | 09260  | B6.129-Cnga2<tm1Kob>                                      | 2               | 2          | 0.6                         | 1.6                 | 3                  | 3                     | 0                         | N.T.                                                                             | N.T.            | N.T.            | N.T.           | N.T.           |
| 18         | 09368  | C3;B6-Tmem59L<tm1(KOMP)Wtsi>                              | 2               | 2          | 2.0                         | 7.0                 | 3                  | 3                     | 0                         | N.T.                                                                             | N.T.            | N.T.            | N.T.           | N.T.           |
| 19         | 09486  | B6.Cg-Xcr1<tm1Ksho>                                       | 2               | 2          | 1.5                         | 1.3                 | 2                  | 2                     | 0                         | N.T.                                                                             | N.T.            | N.T.            | N.T.           | N.T.           |
| 20         | 09560  | B6129S2-Tinagl1<tm1Maru>Tg(CAG/Acr-EGFP)Osb               | 2               | 2          | 2.0                         | 1.5                 | 2                  | 2                     | 0                         | N.T.                                                                             | N.T.            | N.T.            | N.T.           | N.T.           |
| 21         | 09561  | B6129S2-Tinagl1<tm1Maru>                                  | 2               | 2          | 2.0                         | 1.5                 | 2                  | 2                     | 0                         | N.T.                                                                             | N.T.            | N.T.            | N.T.           | N.T.           |
| 22         | 09738  | B6;B6CB-Dhd1<tm1a(KOMP)Katn>                              | 2               | 2          | 0.8                         | 5.0                 | 7                  | 6                     | 1                         | N.T.                                                                             | N.T.            | N.T.            | Confirmed      | N.T.           |
| 23         | 04503  | B6.129P2-Smad7<tm1Tchi>                                   | 2               | 2          | 3.5                         | 1.1                 | 2                  | 2                     | 0                         | Confirmed                                                                        | Confirmed       | N.T.            | N.T.           | N.T.           |
| 24         | 04894  | C57BL/6-Cdc42ep4<tm1Ksh>                                  | 2               | 2          | 3.0                         | 1.6                 | 2                  | 2                     | 0                         | Confirmed                                                                        | Confirmed       | N.T.            | N.T.           | N.T.           |
| 25         | 05584  | C57BL/6N-Ilkzf5<tm1(KOMP)Wtsi>/C06                        | 2               | 2          | 1.8                         | 7.0                 | 9                  | 9                     | 0                         | Confirmed                                                                        | Confirmed       | N.T.            | N.T.           | N.T.           |
| 26         | 09428  | B6.Cg-Adarb1<tm1.1Skwa>Tg(SLC18A3-cre)KMisa               | 2               | 2          | 4.5                         | 1.7                 | 3                  | 3                     | 0                         | Confirmed                                                                        | Confirmed       | N.T.            | N.T.           | N.T.           |
| 27         | 09356  | B6;B6CB-Sp7<tm1Rnis>                                      | 2               | 2          | 4.0                         | 1.8                 | 4                  | 4                     | 0                         | Confirmed                                                                        | Confirmed       | N.T.            | Confirmed      | N.T.           |
| 28         | 01750  | ICR.Cg-Pdzrn3<tm1Ysa>/YsaRbrc                             | 2               | 2          | 2.3                         | 1.7                 | 1                  | 1                     | 0                         | Confirmed                                                                        | Confirmed       | N.T.            | Confirmed      | Confirmed      |
| 29         | 02392  | B6.129P2-Jdp2<tm2Kkyo>/Rbrc                               | 2               | 2          | 2.0                         | 2.0                 | 2                  | 2                     | 0                         | Confirmed                                                                        | Confirmed       | N.T.            | Confirmed      | Confirmed      |
| 30         | 03514  | Hrs(loxp)(Acc.No. CDB0476K)                               | 2               | 2          | 4.0                         | 1.8                 | 8                  | 8                     | 0                         | Confirmed                                                                        | Confirmed       | N.T.            | Confirmed      | Confirmed      |
| 31         | 09537  | B6-Pgk1<tm1(CAG-mcherry-NLS,PGK-Puro)Koba>                | 2               | 2          | 5.0                         | 1.4                 | 12                 | 8                     | 4                         | Confirmed                                                                        | Confirmed       | N.T.            | Confirmed      | Confirmed      |
| 32         | 09730  | B6.Cg-Braf<tm1Tumg>                                       | 2               | 2          | 2.5                         | 1.5                 | 3                  | 3                     | 0                         | Confirmed                                                                        | Confirmed       | N.T.            | Confirmed      | Confirmed      |
| 33         | 09928  | B6.Cg-Xcr1<tm3(KikGR)Ksho>                                | 2               | 2          | 1.5                         | 1.4                 | 3                  | 3                     | 0                         | Confirmed                                                                        | Confirmed       | N.T.            | Confirmed      | Confirmed      |
| 34         | 10188  | C57BL/6-Gt(ROSA)26Sor<tm1(CAG-3XFLAG/dCas9,-EGFP)Hfuj>    | 2               | 2          | 2.6                         | 1.4                 | 7                  | 7                     | 0                         | Confirmed                                                                        | Confirmed       | N.T.            | Confirmed      | Confirmed      |
| 35         | 10449  | B6.129-Hacd1<tm1Akih>                                     | 2               | 2          | 1.6                         | 1.6                 | 2                  | 2                     | 0                         | Confirmed                                                                        | Confirmed       | N.T.            | Confirmed      | Confirmed      |
| 36         | 10582  | C57BL/6N-Adrm1<tm1Smta>                                   | 2               | 2          | 2.7                         | 1.8                 | 3                  | 3                     | 0                         | Confirmed                                                                        | Confirmed       | N.T.            | Confirmed      | Confirmed      |
| 37         | 10843  | B6.Cg-Rit1<tm1(A57G)Tumg>                                 | 2               | 2          | 2.5                         | 1.5                 | 4                  | 4                     | 0                         | Confirmed                                                                        | Confirmed       | N.T.            | Confirmed      | Confirmed      |
| 38         | 05150  | B6;129S6-Gt(ROSA)26Sor<tm1(CAG-eNpHR2/EYFP)Imayo>         | 2               | 2          | 0.8                         | 1.2                 | 2                  | 2                     | 0                         | Confirmed                                                                        | Confirmed       | N.T.            | Confirmed      | N.T.           |
| 39         | 05539  | B6.129-Gt(ROSA)26Sor<tm1(Stop-Bmi1,EGFP)>                 | 2               | 2          | 2.5                         | 1.5                 | 6                  | 6                     | 0                         | Confirmed                                                                        | Confirmed       | N.T.            | N.T.           | Confirmed      |
| 40         | 09246  | C57BL/6-Sik3<tm1Haya>                                     | 2               | 2          | 2.8                         | 1.6                 | 3                  | 3                     | 0                         | Confirmed                                                                        | Confirmed       | N.T.            | Confirmed      | N.T.           |

|    |       |                                                     |   |   |     |      |    |    |   |           |           |      |           |           |
|----|-------|-----------------------------------------------------|---|---|-----|------|----|----|---|-----------|-----------|------|-----------|-----------|
| 41 | 09534 | B6-Pgk1<tm1(CAG-eGFP-NLS,PGK-Neo)Koba>              | 2 | 2 | 6.0 | 1.5  | 3  | 3  | 0 | Confirmed | Confirmed | N.T. | N.T.      | Confirmed |
| 42 | 09649 | C57BL/6-Htr5a<tm2Ahky>                              | 2 | 2 | 2.0 | 1.7  | 3  | 3  | 0 | Confirmed | Confirmed | N.T. | N.T.      | Confirmed |
| 43 | 09907 | 129.Cg-Braf<tm1Tumg>                                | 2 | 2 | 2.5 | 1.5  | 3  | 3  | 0 | N.T.      | Confirmed | N.T. | Confirmed | Confirmed |
| 44 | 05146 | B6;129S6-Gt(ROSA)26Sor<tm1(CAG-mTFP1)Imayo>         | 2 | 2 | 0.6 | 1.2  | 1  | 1  | 0 | Confirmed | N.T.      | N.T. | Confirmed | N.T.      |
| 45 | 10232 | B6.Cg-Reck<tm1Noda>                                 | 2 | 2 | 0.6 | 1.7  | 2  | 2  | 0 | Confirmed | N.T.      | N.T. | N.T.      | Confirmed |
| 46 | 02271 | B6.Cg-Otx2<tm4.1Sia>/SiaRbrc                        | 2 | 1 | 2.5 | N.D. | 11 | 11 | 0 | N.T.      | N.T.      | N.T. | N.T.      | N.T.      |
| 47 | 02338 | B6;129P2-p130Cas<tm2.1Homy>                         | 2 | 1 | 3.0 | N.D. | 2  | 2  | 0 | N.T.      | N.T.      | N.T. | N.T.      | N.T.      |
| 48 | 04333 | B6;B6129-Cyp26b1<tm2Hmd>                            | 2 | 1 | 2.5 | N.D. | 2  | 2  | 0 | N.T.      | N.T.      | N.T. | N.T.      | N.T.      |
| 49 | 05637 | B6D2;129S2-Igsf8<tm1.1Osb>                          | 2 | 1 | 2.2 | N.D. | 2  | 2  | 0 | N.T.      | N.T.      | N.T. | N.T.      | N.T.      |
| 50 | 05663 | B6.Cg-Bcl6<tm1.1Mtto>                               | 2 | 1 | 3.0 | N.D. | 4  | 3  | 1 | N.T.      | N.T.      | N.T. | N.T.      | N.T.      |
| 51 | 06226 | C57BL/6-Bcl11b<tm2.1Jpk>                            | 2 | 1 | 0.6 | N.D. | 3  | 3  | 0 | N.T.      | N.T.      | N.T. | N.T.      | N.T.      |
| 52 | 06522 | B6.Cg-Cthrc1<tm1.1Suna>                             | 2 | 1 | 2.0 | N.D. | 1  | 1  | 0 | N.T.      | N.T.      | N.T. | N.T.      | N.T.      |
| 53 | 06569 | B6(C3)-Ift80<tm1c(KOMP)Wtsi>                        | 2 | 1 | 0.8 | N.D. | 6  | 3  | 3 | N.T.      | N.T.      | N.T. | N.T.      | N.T.      |
| 54 | 09366 | C3;B6-Mef2d<tm1a-flox-tfur>                         | 2 | 1 | 4.2 | N.D. | 3  | 2  | 1 | N.T.      | N.T.      | N.T. | N.T.      | N.T.      |
| 55 | 09538 | B6-Tgfb1<tm1(TGFB1)Dokm>                            | 2 | 1 | 2.1 | N.D. | 6  | 6  | 0 | N.T.      | N.T.      | N.T. | N.T.      | N.T.      |
| 56 | 02234 | STOCK Calr<tm1Osb>                                  | 2 | 1 | 1.5 | N.D. | 1  | 1  | 0 | N.T.      | N.T.      | N.T. | Confirmed | N.T.      |
| 57 | 02236 | STOCK Canx<tm1Osb>                                  | 2 | 1 | 0.8 | N.D. | 1  | 1  | 0 | N.T.      | N.T.      | N.T. | Confirmed | N.T.      |
| 58 | 05154 | B6;129S6-Gt(ROSA)26Sor<tm1.1(CAG-EGFP/TeNT)Imayo>   | 2 | 1 | 0.8 | N.D. | 1  | 1  | 0 | N.T.      | N.T.      | N.T. | Confirmed | N.T.      |
| 59 | 05661 | B6.Cg-Pcp4<tm1.1>                                   | 2 | 1 | 2.8 | N.D. | 14 | 14 | 0 | N.T.      | N.T.      | N.T. | Confirmed | N.T.      |
| 60 | 05691 | B6;129-Fgf18<tm1Tri>                                | 2 | 1 | 1.3 | N.D. | 5  | 5  | 0 | N.T.      | N.T.      | N.T. | Confirmed | N.T.      |
| 61 | 06584 | C57BL/6-Tg(Gt(ROSA)26Sor-eNpHR3/EYFP)1.1Imayo       | 2 | 1 | 2.7 | N.D. | 11 | 10 | 1 | N.T.      | N.T.      | N.T. | Confirmed | N.T.      |
| 62 | 06586 | C57BL/6-Tg(Gt(ROSA)26Sor-ArchT/EGFP)1.1Imayo        | 2 | 1 | 2.5 | N.D. | 2  | 2  | 0 | N.T.      | N.T.      | N.T. | Confirmed | N.T.      |
| 63 | 09669 | C57BL/6-Slc17a7<tm1.1Sse>                           | 2 | 1 | 0.9 | N.D. | 3  | 3  | 0 | N.T.      | N.T.      | N.T. | Confirmed | N.T.      |
| 64 | 09689 | B6(Cg)-Tmem132a<tm1c(KOMP)Wtsi>/Tfur                | 2 | 1 | 1.5 | N.D. | 2  | 2  | 0 | N.T.      | N.T.      | N.T. | Confirmed | N.T.      |
| 65 | 02295 | B6.Cg-p130Cas<tm1.2Homy> Tg(BL-Gre)1Homy            | 2 | 1 | 0.9 | N.D. | 4  | 4  | 0 | Confirmed | Confirmed | N.T. | N.T.      | N.T.      |
| 66 | 06410 | B6.Cg-Nfkbiz<tm1.1Muta>                             | 2 | 1 | 2.0 | N.D. | 5  | 5  | 0 | Confirmed | Confirmed | N.T. | N.T.      | N.T.      |
| 67 | 06214 | B6.Cg-Gipr<tm1.2Hko>                                | 2 | 1 | 0.6 | N.D. | 2  | 2  | 0 | Confirmed | N.T.      | N.T. | Confirmed | N.T.      |
| 68 | 01464 | C57BL/6-Cacna1gflox/+                               | 2 | 1 | 0.8 | N.D. | 11 | 11 | 0 | Confirmed | Confirmed | N.T. | Confirmed | N.T.      |
| 69 | 01755 | ICR.Cg-Pdzr3<tm1.1Ysa>/YsaRbrc                      | 2 | 1 | 2.3 | N.D. | 1  | 1  | 0 | Confirmed | Confirmed | N.T. | Confirmed | N.T.      |
| 70 | 04608 | B6;129P2-Runx1<tm1Homy>                             | 2 | 1 | 3.6 | N.D. | 2  | 2  | 0 | Confirmed | Confirmed | N.T. | Confirmed | N.T.      |
| 71 | 05147 | B6;129S6-Gt(ROSA)26Sor<tm1.1(CAG-mTFP1)Imayo>       | 2 | 1 | 0.6 | N.D. | 2  | 2  | 0 | Confirmed | Confirmed | N.T. | Confirmed | N.T.      |
| 72 | 05151 | B6;129S6-Gt(ROSA)26Sor<tm1.1(CAG-eNpHR2/EYFP)Imayo> | 2 | 1 | 0.8 | N.D. | 1  | 1  | 0 | Confirmed | Confirmed | N.T. | Confirmed | N.T.      |
| 73 | 05163 | B6;129S6-Gt(ROSA)26Sor<tm1.1(CAG-GCaMP3)Imayo>      | 2 | 1 | 0.8 | N.D. | 2  | 2  | 0 | Confirmed | Confirmed | N.T. | Confirmed | N.T.      |
| 74 | 05199 | B6;129P2-Kdm2b<tm1Homy>                             | 2 | 1 | 0.7 | N.D. | 2  | 2  | 0 | Confirmed | Confirmed | N.T. | Confirmed | N.T.      |
| 75 | 05494 | B6;129P2-Tnfaip3<tm1Homy>                           | 2 | 1 | 0.8 | N.D. | 2  | 2  | 0 | Confirmed | Confirmed | N.T. | Confirmed | N.T.      |
| 76 | 05515 | B6;129S4-Ern1<tm2.1Tiw>                             | 2 | 1 | 0.8 | N.D. | 9  | 9  | 0 | Confirmed | Confirmed | N.T. | Confirmed | N.T.      |
| 77 | 05598 | B6.129(Cg)-Vps41<tm1Ywd>                            | 2 | 1 | 4.8 | N.D. | 3  | 2  | 1 | Confirmed | Confirmed | N.T. | Confirmed | N.T.      |
| 78 | 05604 | C57BL/6N-Stxbp1<tm1Ksak>                            | 2 | 1 | 0.6 | N.D. | 4  | 4  | 0 | Confirmed | Confirmed | N.T. | Confirmed | N.T.      |
| 79 | 05605 | C57BL/6N-Stxbp5<tm1Ksak>                            | 2 | 1 | 0.7 | N.D. | 4  | 4  | 0 | Confirmed | Confirmed | N.T. | Confirmed | N.T.      |
| 80 | 05655 | B6;129P2-Cbl<tm1(CBL*Q367P)Homy>                    | 2 | 1 | 2.8 | N.D. | 2  | 2  | 0 | Confirmed | Confirmed | N.T. | Confirmed | N.T.      |
| 81 | 05760 | B6.Cg-Spred1<tm1.1Ayo>                              | 2 | 1 | 1.8 | N.D. | 2  | 2  | 0 | Confirmed | Confirmed | N.T. | Confirmed | N.T.      |
| 82 | 05881 | B6.Cg-Phf2<tm1.2Yima>                               | 2 | 1 | 1.5 | N.D. | 10 | 10 | 0 | Confirmed | Confirmed | N.T. | Confirmed | N.T.      |
| 83 | 05950 | B6.Cg-Lrrc32<tm1Hfuj>                               | 2 | 1 | 0.7 | N.D. | 22 | 22 | 0 | Confirmed | Confirmed | N.T. | Confirmed | N.T.      |
| 84 | 06142 | B6.129-Tnfsf11<tm1>                                 | 2 | 1 | 0.7 | N.D. | 2  | 2  | 0 | Confirmed | Confirmed | N.T. | Confirmed | N.T.      |
| 85 | 06212 | B6.Cg-Bdnf<tm1.2Hko>                                | 2 | 1 | 2.0 | N.D. | 10 | 10 | 0 | Confirmed | Confirmed | N.T. | Confirmed | N.T.      |
| 86 | 06216 | B6.Cg-Mc4r<tm1.2Hko>                                | 2 | 1 | 1.6 | N.D. | 9  | 9  | 0 | Confirmed | Confirmed | N.T. | Confirmed | N.T.      |
| 87 | 06248 | B6.129-Brd1<tm2Hko>                                 | 2 | 1 | 1.8 | N.D. | 6  | 6  | 0 | Confirmed | Confirmed | N.T. | Confirmed | N.T.      |

|     |       |                                             |   |   |     |      |    |    |   |           |           |      |           |      |
|-----|-------|---------------------------------------------|---|---|-----|------|----|----|---|-----------|-----------|------|-----------|------|
| 88  | 06385 | C57BL/6-Dhx15<tm1Hijo>                      | 2 | 1 | 1.8 | N.D. | 6  | 6  | 0 | Confirmed | Confirmed | N.T. | Confirmed | N.T. |
| 89  | 06500 | SJL.Cg-Aqp4<tm1.1(GFP)Mysi>/MysiRbrc        | 2 | 1 | 0.9 | N.D. | 4  | 4  | 0 | Confirmed | Confirmed | N.T. | Confirmed | N.T. |
| 90  | 06504 | B6;129-Lamc1<tm2.1Ksek>                     | 2 | 1 | 4.5 | N.D. | 27 | 27 | 0 | Confirmed | Confirmed | N.T. | Confirmed | N.T. |
| 91  | 06589 | C57BL/6-Tg(Gt(ROSA)26Sor-C1V1/EYFP)1.1Imayo | 2 | 1 | 2.7 | N.D. | 4  | 4  | 0 | Confirmed | Confirmed | N.T. | Confirmed | N.T. |
| 92  | 06800 | B6.Cg-Ncaph<tm1.1Hiran>                     | 2 | 1 | 2.2 | N.D. | 7  | 7  | 0 | Confirmed | Confirmed | N.T. | Confirmed | N.T. |
| 93  | 06801 | B6.Cg-Ncaph2<tm1.1Hiran>                    | 2 | 1 | 2.0 | N.D. | 1  | 1  | 0 | Confirmed | Confirmed | N.T. | Confirmed | N.T. |
| 94  | 06802 | B6.Cg-Smc2<tm1.1Hiran>                      | 2 | 1 | 2.5 | N.D. | 8  | 8  | 0 | Confirmed | Confirmed | N.T. | Confirmed | N.T. |
| 95  | 09371 | 129;B6-Prdm13<tm1.1Tfur>                    | 2 | 1 | 2.2 | N.D. | 4  | 4  | 0 | Confirmed | Confirmed | N.T. | Confirmed | N.T. |
| 96  | 09433 | 129(Cg)-Ick<tm1.1Tfur>                      | 2 | 1 | 2.2 | N.D. | 3  | 3  | 0 | Confirmed | Confirmed | N.T. | Confirmed | N.T. |
| 97  | 09483 | B6.B6CB-Rnf31<tm1.1Kiwa>                    | 2 | 1 | 4.0 | N.D. | 6  | 6  | 0 | Confirmed | Confirmed | N.T. | Confirmed | N.T. |
| 98  | 09630 | C57BL/6-Haus6<tm1.1>                        | 2 | 1 | 0.6 | N.D. | 2  | 2  | 0 | Confirmed | Confirmed | N.T. | Confirmed | N.T. |
| 99  | 09681 | B6.129-Foxf1<tm1.1Tsuka>                    | 2 | 1 | 1.8 | N.D. | 3  | 3  | 0 | Confirmed | Confirmed | N.T. | Confirmed | N.T. |
| 100 | 09796 | B6.Cg-Ano6<tm1.1Naga>                       | 2 | 1 | 1.2 | N.D. | 3  | 3  | 0 | Confirmed | Confirmed | N.T. | Confirmed | N.T. |
| 101 | 09808 | C57BL/6-Rnf31<tm2.1Kiwa>                    | 2 | 1 | 2.5 | N.D. | 3  | 3  | 0 | Confirmed | Confirmed | N.T. | Confirmed | N.T. |
| 102 | 09821 | B6.129-Napepld<tm1.1Ueda>                   | 2 | 1 | 1.5 | N.D. | 3  | 3  | 0 | Confirmed | Confirmed | N.T. | Confirmed | N.T. |
| 103 | 09861 | B6.Cg-Calcr<tm1c(KOMP)Sfuk>                 | 2 | 1 | 3.2 | N.D. | 3  | 3  | 0 | Confirmed | Confirmed | N.T. | Confirmed | N.T. |
| 104 | 09870 | B6;B6129-Cbx7<tm1.1Hko>                     | 2 | 1 | 1.2 | N.D. | 7  | 7  | 0 | Confirmed | Confirmed | N.T. | Confirmed | N.T. |
| 105 | 09871 | B6;B6129-Cbx8<tm1Hko>                       | 2 | 1 | 1.0 | N.D. | 17 | 17 | 0 | Confirmed | Confirmed | N.T. | Confirmed | N.T. |
| 106 | 09894 | B6.129-Has2<tm1.1Nita>                      | 2 | 1 | 1.3 | N.D. | 3  | 3  | 0 | Confirmed | Confirmed | N.T. | Confirmed | N.T. |
| 107 | 09913 | C57BL/6-Drd1<tm1.1Mmsh>                     | 2 | 1 | 4.5 | N.D. | 4  | 4  | 0 | Confirmed | Confirmed | N.T. | Confirmed | N.T. |
| 108 | 09914 | C57BL/6-Drd2<tm1.1Mmsh>                     | 2 | 1 | 1.2 | N.D. | 5  | 5  | 0 | Confirmed | Confirmed | N.T. | Confirmed | N.T. |
| 109 | 09923 | C57BL/6N-Zeb1<tm3.1Yhi>                     | 2 | 1 | 5.8 | N.D. | 3  | 3  | 0 | Confirmed | Confirmed | N.T. | Confirmed | N.T. |
| 110 | 10060 | B6.Cg-F8<tm1.1(EGFP)Tsuka>                  | 2 | 1 | 6.0 | N.D. | 3  | 3  | 0 | Confirmed | Confirmed | N.T. | Confirmed | N.T. |
| 111 | 10083 | C57BL/6-Map3k5<tm3.1Hijo>                   | 2 | 1 | 1.3 | N.D. | 22 | 22 | 0 | Confirmed | Confirmed | N.T. | Confirmed | N.T. |
| 112 | 10097 | B6;Cg-Dach1<tm1.2Hhsk>                      | 2 | 1 | 1.4 | N.D. | 6  | 6  | 0 | Confirmed | Confirmed | N.T. | Confirmed | N.T. |
| 113 | 10212 | B6;Cg-Paxbp1<tm1.1Hko>                      | 2 | 1 | 2.3 | N.D. | 6  | 6  | 0 | Confirmed | Confirmed | N.T. | Confirmed | N.T. |
| 114 | 10219 | B6.B6CB-Rnf31<tm1.1Kiwa> Ripk3<em1Kiwa>     | 2 | 1 | 4.5 | N.D. | 3  | 3  | 0 | Confirmed | Confirmed | N.T. | Confirmed | N.T. |
| 115 | 10242 | B6.129-Scn1a<tm2.1Kzy>                      | 2 | 1 | 0.5 | N.D. | 3  | 3  | 0 | Confirmed | Confirmed | N.T. | Confirmed | N.T. |
| 116 | 10245 | B6.Cg-Tnfrsf13c<tm2.1Mass>                  | 2 | 1 | 1.4 | N.D. | 2  | 2  | 0 | Confirmed | Confirmed | N.T. | Confirmed | N.T. |
| 117 | 10268 | B6;129-Mlc1<tm1.1kftnk>                     | 2 | 1 | 0.5 | N.D. | 11 | 11 | 0 | Confirmed | Confirmed | N.T. | Confirmed | N.T. |
| 118 | 10293 | C57BL/6-Itpr2<tm2.1Kmik>                    | 2 | 1 | 1.0 | N.D. | 4  | 4  | 0 | Confirmed | Confirmed | N.T. | Confirmed | N.T. |
| 119 | 10302 | C3;B6-Lrit1<tm1c(EUCOMM)Hmgu>/Tfur          | 2 | 1 | 1.2 | N.D. | 3  | 3  | 0 | Confirmed | Confirmed | N.T. | Confirmed | N.T. |
| 120 | 10308 | B6.Cg-Nfil3<tm1.2Kubo>                      | 2 | 1 | 2.0 | N.D. | 7  | 7  | 0 | Confirmed | Confirmed | N.T. | Confirmed | N.T. |
| 121 | 10320 | B6;Cg-Kdm2a<tm1.1Hko>                       | 2 | 1 | 0.6 | N.D. | 8  | 8  | 0 | Confirmed | Confirmed | N.T. | Confirmed | N.T. |
| 122 | 10382 | B6.Cg-Arf6<tm2.1Yaka>                       | 2 | 1 | 6.0 | N.D. | 5  | 5  | 0 | Confirmed | Confirmed | N.T. | Confirmed | N.T. |
| 123 | 10433 | Runx2 (loxP) (Acc. No. CDB0832K)            | 2 | 1 | 0.9 | N.D. | 3  | 3  | 0 | Confirmed | Confirmed | N.T. | Confirmed | N.T. |
| 124 | 10464 | B6.129S4-Cenpu<tm2.1Tfw>/Yuwa               | 2 | 1 | 4.0 | N.D. | 2  | 2  | 0 | Confirmed | Confirmed | N.T. | Confirmed | N.T. |
| 125 | 10579 | C57BL/6N-Adrm1<tm1.2Smta>                   | 2 | 1 | 1.0 | N.D. | 3  | 3  | 0 | Confirmed | Confirmed | N.T. | Confirmed | N.T. |
| 126 | 10581 | C57BL/6N-Sem1<tm1.2Smta>                    | 2 | 1 | 0.7 | N.D. | 3  | 3  | 0 | Confirmed | Confirmed | N.T. | Confirmed | N.T. |
| 127 | 10603 | C57BL/6-Chn1<tm1lto>                        | 2 | 1 | 2.2 | N.D. | 9  | 9  | 0 | Confirmed | Confirmed | N.T. | Confirmed | N.T. |
| 128 | 10732 | C57BL/6-Ntng1<tm2.1lto>                     | 2 | 1 | 4.0 | N.D. | 3  | 3  | 0 | Confirmed | Confirmed | N.T. | Confirmed | N.T. |
| 129 | 10762 | B6.B6CB-Gsdmd<tm1.2Tshir>/Ms                | 2 | 1 | 3.6 | N.D. | 12 | 12 | 0 | Confirmed | Confirmed | N.T. | Confirmed | N.T. |
| 130 | 10850 | B6;B6129-Tet3<tm1.1Hko>                     | 2 | 1 | 1.4 | N.D. | 2  | 2  | 0 | Confirmed | Confirmed | N.T. | Confirmed | N.T. |
| 131 | 10925 | C57BL/6N-Dbn1<tm2.1Shira>                   | 2 | 1 | 0.7 | N.D. | 3  | 3  | 0 | Confirmed | Confirmed | N.T. | Confirmed | N.T. |
| 132 | 10934 | C57BL/6N-Dbn1<tm1.2Shira>                   | 2 | 1 | 0.7 | N.D. | 3  | 3  | 0 | Confirmed | Confirmed | N.T. | Confirmed | N.T. |
| 133 | 10937 | C57BL/6-Sik3<tm1.1Haya>                     | 2 | 1 | 1.1 | N.D. | 2  | 2  | 0 | Confirmed | Confirmed | N.T. | Confirmed | N.T. |
| 134 | 02694 | B6.Cg-Ptk2<tm1Mmsh>                         | 2 | 1 | 0.8 | N.D. | 6  | 6  | 0 | N.T.      | Confirmed | N.T. | Confirmed | N.T. |
| 135 | 09656 | C57BL/6N-Lcmt1<tm1c(EUCOMM)Hmgu>/C09        | 2 | 1 | 0.8 | N.D. | 1  | 1  | 0 | Confirmed | N.T.      | N.T. | Confirmed | N.T. |

|     |       |                                                        |   |   |     |      |    |    |   |           |           |      |           |      |
|-----|-------|--------------------------------------------------------|---|---|-----|------|----|----|---|-----------|-----------|------|-----------|------|
| 136 | 09809 | B6.Cg-Sharpin<tm1.1Kiwa>                               | 2 | 1 | 2.8 | N.D. | 3  | 3  | 0 | Confirmed | N.T.      | N.T. | Confirmed | N.T. |
| 137 | 00892 | C57BL/6-Tg(CAG-EGFP,-Aicda)20Hon/HonRbrc               | 2 | 0 | 1.3 | N.D. | 3  | 3  | 0 | N.T.      | N.T.      | N.T. | N.T.      | N.T. |
| 138 | 01308 | B6.Cg-Hbegf<tm1Mek>/MekRbrc                            | 2 | 0 | 1.0 | N.D. | 4  | 4  | 0 | N.T.      | N.T.      | N.T. | N.T.      | N.T. |
| 139 | 01494 | B6;129S2-Dppa3<tm1(rtTA)Nkn>/NknRbrc                   | 2 | 0 | 2.0 | N.D. | 4  | 4  | 0 | N.T.      | N.T.      | N.T. | N.T.      | N.T. |
| 140 | 01872 | ApcFlox14                                              | 2 | 0 | 1.2 | N.D. | 9  | 9  | 0 | N.T.      | N.T.      | N.T. | N.T.      | N.T. |
| 141 | 02096 | B6.Cg-Tg(CAG-floxed Neo-EGFP)REP08Osb                  | 2 | 0 | 1.9 | N.D. | 3  | 3  | 0 | N.T.      | N.T.      | N.T. | N.T.      | N.T. |
| 142 | 02280 | B6.129S4-Ephb6<tm1Tom>                                 | 2 | 0 | 2.0 | N.D. | 6  | 6  | 0 | N.T.      | N.T.      | N.T. | N.T.      | N.T. |
| 143 | 02343 | B6.129P2-Nf2<tm2Gth>                                   | 2 | 0 | 2.2 | N.D. | 6  | 6  | 0 | N.T.      | N.T.      | N.T. | N.T.      | N.T. |
| 144 | 02344 | FVB.129P2-Nf2<tm2Gth>                                  | 2 | 0 | 2.2 | N.D. | 4  | 4  | 0 | N.T.      | N.T.      | N.T. | N.T.      | N.T. |
| 145 | 02368 | B6.Cg-Nr1i2<tm1(NR1I2)>                                | 2 | 0 | 1.5 | N.D. | 3  | 3  | 0 | N.T.      | N.T.      | N.T. | N.T.      | N.T. |
| 146 | 02657 | B6.129P2-Gt(ROSA)26Sor<tm1(NLS-lacZ)lto>               | 2 | 0 | 2.8 | N.D. | 3  | 3  | 0 | N.T.      | N.T.      | N.T. | N.T.      | N.T. |
| 147 | 02697 | B6;129P2-Rapgef2<tm1Tkat>                              | 2 | 0 | 0.7 | N.D. | 2  | 2  | 0 | N.T.      | N.T.      | N.T. | N.T.      | N.T. |
| 148 | 02717 | C57BL/6J-Tg(CAG-xstopx-P1ce1,-lacZ)ATkat               | 2 | 0 | 1.4 | N.D. | 3  | 3  | 0 | N.T.      | N.T.      | N.T. | N.T.      | N.T. |
| 149 | 02741 | C57BL/6J-Tg(CAG-xstopx-P1ce1,-lacZ)GTkat               | 2 | 0 | 1.4 | N.D. | 3  | 3  | 0 | N.T.      | N.T.      | N.T. | N.T.      | N.T. |
| 150 | 02742 | C57BL/6J-Tg(CAG-xstopx-P1ce1,-lacZ)HTkat               | 2 | 0 | 1.4 | N.D. | 2  | 2  | 0 | N.T.      | N.T.      | N.T. | N.T.      | N.T. |
| 151 | 03420 | B6;129-Apoe<tm2(APOE)Sfu>/19SfuRbrc                    | 2 | 0 | 1.8 | N.D. | 8  | 8  | 0 | N.T.      | N.T.      | N.T. | N.T.      | N.T. |
| 152 | 03731 | B6;129S4-Dnmt3a<tm3.1Enl>                              | 2 | 0 | 0.8 | N.D. | 5  | 5  | 0 | N.T.      | N.T.      | N.T. | N.T.      | N.T. |
| 153 | 04110 | B6;129-Cyp26a1<tm1.2Hmd>                               | 2 | 0 | 5.0 | N.D. | 4  | 4  | 0 | N.T.      | N.T.      | N.T. | N.T.      | N.T. |
| 154 | 04909 | B6.129P2-Il1f6<tm1Yiw>                                 | 2 | 0 | 1.6 | N.D. | 5  | 5  | 0 | N.T.      | N.T.      | N.T. | N.T.      | N.T. |
| 155 | 05362 | B6.Cg-Fah<tm1Sia>/Rbrc                                 | 2 | 0 | 1.7 | N.D. | 4  | 4  | 0 | N.T.      | N.T.      | N.T. | N.T.      | N.T. |
| 156 | 05517 | B6;129S4-Xbp1<tm1Tiw>                                  | 2 | 0 | 2.0 | N.D. | 8  | 8  | 0 | N.T.      | N.T.      | N.T. | N.T.      | N.T. |
| 157 | 05582 | C57BL/6N-lkzf3<tm1(KOMP)Vlcg>/CB3                      | 2 | 0 | 2.8 | N.D. | 4  | 4  | 0 | N.T.      | N.T.      | N.T. | N.T.      | N.T. |
| 158 | 05654 | B6.Cg-Tg(CAG-mRFP1,-SOX9,EGFP)1Haak                    | 2 | 0 | 2.0 | N.D. | 2  | 2  | 0 | N.T.      | N.T.      | N.T. | N.T.      | N.T. |
| 159 | 06390 | B6;129P2-Fbxl5<tm2.1Kei>                               | 2 | 0 | 3.5 | N.D. | 2  | 2  | 0 | N.T.      | N.T.      | N.T. | N.T.      | N.T. |
| 160 | 06393 | B6;129P2-Fbxw7<tm1Kei>                                 | 2 | 0 | 0.8 | N.D. | 2  | 2  | 0 | N.T.      | N.T.      | N.T. | N.T.      | N.T. |
| 161 | 06446 | B6.129-Clmp<tm1Jwada>                                  | 2 | 0 | 1.8 | N.D. | 3  | 3  | 0 | N.T.      | N.T.      | N.T. | N.T.      | N.T. |
| 162 | 06448 | STOCK Clmp<tm1Jwada>                                   | 2 | 0 | 1.8 | N.D. | 9  | 9  | 0 | N.T.      | N.T.      | N.T. | N.T.      | N.T. |
| 163 | 06511 | B6;129-Gt(ROSA)26Sor<tm1(Fucci2aR)Jkn>                 | 2 | 0 | 1.4 | N.D. | 26 | 26 | 0 | N.T.      | N.T.      | N.T. | N.T.      | N.T. |
| 164 | 06559 | B6J.129P2-Brsk2<tm1Mkt>/52Yhi                          | 2 | 0 | 1.8 | N.D. | 3  | 3  | 0 | N.T.      | N.T.      | N.T. | N.T.      | N.T. |
| 165 | 06560 | B6J.129P2-Brsk2<tm1Mkt>/28Yhi                          | 2 | 0 | 1.8 | N.D. | 3  | 3  | 0 | N.T.      | N.T.      | N.T. | N.T.      | N.T. |
| 166 | 06561 | B6N.129P2-Brsk2<tm1Mkt>/52Yhi                          | 2 | 0 | 1.8 | N.D. | 3  | 3  | 0 | N.T.      | N.T.      | N.T. | N.T.      | N.T. |
| 167 | 06562 | B6N.129P2-Brsk2<tm1Mkt>/28Yhi                          | 2 | 0 | 1.8 | N.D. | 3  | 3  | 0 | N.T.      | N.T.      | N.T. | N.T.      | N.T. |
| 168 | 06577 | B6.129P2-Reck<tm2.1Noda>                               | 2 | 0 | 1.2 | N.D. | 4  | 3  | 1 | N.T.      | N.T.      | N.T. | N.T.      | N.T. |
| 169 | 09364 | B6;129S-lgs7<tm92.1(tetO-YCX2.60)Hze>/J                | 2 | 0 | 1.0 | N.D. | 4  | 4  | 0 | N.T.      | N.T.      | N.T. | N.T.      | N.T. |
| 170 | 09369 | C3;B6-Tmem215<tm1(KOMP)Vlcg>                           | 2 | 0 | 2.8 | N.D. | 3  | 3  | 0 | N.T.      | N.T.      | N.T. | N.T.      | N.T. |
| 171 | 06402 | B6;129P2-Cdkn1c<tm2.1Kei>                              | 2 | 0 | 2.8 | N.D. | 1  | 1  | 0 | Confirmed | Confirmed | N.T. | N.T.      | N.T. |
| 172 | 01071 | Floxed RBP-J                                           | 2 | 0 | 3.0 | N.D. | 10 | 10 | 0 | Confirmed | Confirmed | N.T. | N.T.      | N.T. |
| 173 | 01105 | B6.Cg-Sema3a<tm1.3Tyag>/TyagRbrc                       | 2 | 0 | 6.0 | N.D. | 1  | 1  | 0 | Confirmed | Confirmed | N.T. | N.T.      | N.T. |
| 174 | 01377 | ICR.Cg-Meox1<tm1(cre)Ysa>/YsaRbrc                      | 2 | 0 | 1.8 | N.D. | 3  | 3  | 0 | Confirmed | Confirmed | N.T. | N.T.      | N.T. |
| 175 | 02308 | C57BL/6-Cxcl14<tm1>                                    | 2 | 0 | 2.8 | N.D. | 3  | 3  | 0 | Confirmed | Confirmed | N.T. | N.T.      | N.T. |
| 176 | 02566 | ICR.Cg-Nanos3<tm3(lacZ)Ysa>/YsaRbrc                    | 2 | 0 | 1.8 | N.D. | 2  | 2  | 0 | Confirmed | Confirmed | N.T. | N.T.      | N.T. |
| 177 | 02574 | B6;129P2-Phgdh<tm2Bsi>                                 | 2 | 0 | 2.8 | N.D. | 5  | 5  | 0 | Confirmed | Confirmed | N.T. | N.T.      | N.T. |
| 178 | 02645 | B6;B6CB-Mybl2<tm2Sis>                                  | 2 | 0 | 3.5 | N.D. | 6  | 6  | 0 | Confirmed | Confirmed | N.T. | N.T.      | N.T. |
| 179 | 03460 | B6;129S2-Sgms1<tm1Kenw>                                | 2 | 0 | 1.5 | N.D. | 2  | 2  | 0 | Confirmed | Confirmed | N.T. | N.T.      | N.T. |
| 180 | 03709 | B6.B6CB-Disc1<tm1Kozo>                                 | 2 | 0 | 1.7 | N.D. | 2  | 2  | 0 | Confirmed | Confirmed | N.T. | N.T.      | N.T. |
| 181 | 04895 | B6(Cg)-Timd4<tm1Osa>                                   | 2 | 0 | 1.8 | N.D. | 2  | 2  | 0 | Confirmed | Confirmed | N.T. | N.T.      | N.T. |
| 182 | 05432 | C57BL/6N-D1Pas1<tm1(KOMP)Vlcg>/D4                      | 2 | 0 | 2.6 | N.D. | 5  | 5  | 0 | Confirmed | Confirmed | N.T. | N.T.      | N.T. |
| 183 | 05928 | B6.Cg-Map3k5<tm1Hijo> Map3k6<tm1Hijo> Map3k15<tm1Hijo> | 2 | 0 | 1.6 | N.D. | 6  | 6  | 0 | Confirmed | Confirmed | N.T. | N.T.      | N.T. |

|     |       |                                                |   |   |                     |      |     |                  |     |           |                         |      |      |                         |    |
|-----|-------|------------------------------------------------|---|---|---------------------|------|-----|------------------|-----|-----------|-------------------------|------|------|-------------------------|----|
| 184 | 06002 | ICR.Cg-Gt(ROSA)26Sor<tm1(Hes1,EGFP)Imayo>      | 2 | 0 | 2.7                 | N.D. | 11  | 11               | 0   | Confirmed | Confirmed               | N.T. | N.T. | N.T.                    |    |
| 185 | 06221 | B6;129-Slc39a10<tm1.1Tfk>                      | 2 | 0 | 8.0                 | N.D. | 18  | 4                | 14  | Confirmed | Confirmed               | N.T. | N.T. | N.T.                    |    |
| 186 | 06322 | B6.Cg-Edn1<tm1Ywa>                             | 2 | 0 | 2.0                 | N.D. | 2   | 2                | 0   | Confirmed | Confirmed               | N.T. | N.T. | N.T.                    |    |
| 187 | 06397 | B6;129P2-Fkbp8<tm1Kei>                         | 2 | 0 | 1.6                 | N.D. | 3   | 3                | 0   | Confirmed | Confirmed               | N.T. | N.T. | N.T.                    |    |
| 188 | 09308 | B6.129-Capn2<tm2.1Tcs>                         | 2 | 0 | 0.7                 | N.D. | 6   | 6                | 0   | Confirmed | Confirmed               | N.T. | N.T. | N.T.                    |    |
| 189 | 09390 | C57BL/6-Nkapl<tm1(KOMP)Vlcg>/1Htan             | 2 | 0 | 2.8                 | N.D. | 3   | 3                | 0   | Confirmed | Confirmed               | N.T. | N.T. | N.T.                    |    |
| 190 | 09426 | B6.129-Nepro<tm1(Venus)Tets> flox              | 2 | 0 | 1.8                 | N.D. | 2   | 2                | 0   | Confirmed | Confirmed               | N.T. | N.T. | N.T.                    |    |
| 191 | 09427 | B6.129-Nepro<tm2(Venus)Tets> flox              | 2 | 0 | 1.8                 | N.D. | 2   | 2                | 0   | Confirmed | Confirmed               | N.T. | N.T. | N.T.                    |    |
| 192 | 09647 | B6;Cg-Notch2<tm1.1Hhi>                         | 2 | 0 | 2.5                 | N.D. | 10  | 10               | 0   | Confirmed | Confirmed               | N.T. | N.T. | N.T.                    |    |
| 193 | 09710 | B6.Cg-Slc25a24<tm1Sinos>                       | 2 | 0 | 1.6                 | N.D. | 8   | 8                | 0   | Confirmed | Confirmed               | N.T. | N.T. | N.T.                    |    |
| 194 | 09758 | B6;129P2-Chd8<tm1Kei>                          | 2 | 0 | 1.6                 | N.D. | 2   | 2                | 0   | Confirmed | Confirmed               | N.T. | N.T. | N.T.                    |    |
| 195 | 09768 | B6.Cg-Gt(ROSA)26Sor<tm2(CAG-HIST1H2BJ)Shna>/24 | 2 | 0 | 2.7                 | N.D. | 4   | 4                | 0   | Confirmed | Confirmed               | N.T. | N.T. | N.T.                    |    |
| 196 | 09806 | B6.Cg-Tg(CAG-cat,-EGFP)39Miya                  | 2 | 0 | 1.8                 | N.D. | 9   | 9                | 0   | Confirmed | Confirmed               | N.T. | N.T. | N.T.                    |    |
| 197 | 09859 | C57BL/6J-Tg(CMV-cat,-SDHA<*>Y215F)1Hom         | 2 | 0 | 1.7                 | N.D. | 3   | 3                | 0   | Confirmed | Confirmed               | N.T. | N.T. | N.T.                    |    |
| 198 | 09865 | B6;B6129-Cbx2<tm1.1Hko>                        | 2 | 0 | 1.2                 | N.D. | 6   | 6                | 0   | Confirmed | Confirmed               | N.T. | N.T. | N.T.                    |    |
| 199 | 10084 | B6.Cg-Zfyve27<tm1Kei>                          | 2 | 0 | 1.5                 | N.D. | 2   | 2                | 0   | Confirmed | Confirmed               | N.T. | N.T. | N.T.                    |    |
| 200 | 10140 | B6;Cg-Gt(ROSA)26Sor<tm1(EWSR1/ATF1)Yasu>       | 2 | 0 | 2.9                 | N.D. | 10  | 6                | 4   | Confirmed | Confirmed               | N.T. | N.T. | N.T.                    |    |
| 201 | 10148 | B6.129-Nfe2l1<tm1.2Mym>                        | 2 | 0 | 2.5                 | N.D. | 3   | 3                | 0   | Confirmed | Confirmed               | N.T. | N.T. | N.T.                    |    |
| 202 | 10168 | B6.129-Dock2<tm1Tsas>                          | 2 | 0 | 1.6                 | N.D. | 6   | 6                | 0   | Confirmed | Confirmed               | N.T. | N.T. | N.T.                    |    |
| 203 | 10254 | C57BL/6-Il17rb<tm1Tgi>                         | 2 | 0 | 2.0                 | N.D. | 6   | 6                | 0   | Confirmed | Confirmed               | N.T. | N.T. | N.T.                    |    |
| 204 | 10269 | C57BL/6-Tg(CAG-floxed EGFP,-rtTA,-tTS)1Kyot    | 2 | 0 | 1.1                 | N.D. | 2   | 2                | 0   | Confirmed | Confirmed               | N.T. | N.T. | N.T.                    |    |
| 205 | 10317 | B6;129-Epc1<tm1Hko>                            | 2 | 0 | 2.0                 | N.D. | 3   | 3                | 0   | Confirmed | Confirmed               | N.T. | N.T. | N.T.                    |    |
| 206 | 10368 | B6.129P2-Pin1<tm1Tuc>                          | 2 | 0 | 1.8                 | N.D. | 6   | 6                | 0   | Confirmed | Confirmed               | N.T. | N.T. | N.T.                    |    |
| 207 | 10386 | B6.Cg-Pld2<tm1Yaka>                            | 2 | 0 | 1.3                 | N.D. | 4   | 4                | 0   | Confirmed | Confirmed               | N.T. | N.T. | N.T.                    |    |
| 208 | 10896 | B6.129P2-Mapk1<tm2.1Moga>                      | 2 | 0 | 2.3                 | N.D. | 3   | 3                | 0   | Confirmed | Confirmed               | N.T. | N.T. | N.T.                    |    |
| 209 | 10935 | B6N.129-Brsk1<tm1Jrs>/Kcn                      | 2 | 0 | 1.9                 | N.D. | 3   | 3                | 0   | Confirmed | Confirmed               | N.T. | N.T. | N.T.                    |    |
| 210 | 10936 | B6N.129-Brsk2<tm1Jrs>/Kcn                      | 2 | 0 | 1.9                 | N.D. | 3   | 3                | 0   | Confirmed | Confirmed               | N.T. | N.T. | N.T.                    |    |
| 211 | 01422 | B6.Cg-Ehmt1<tm1Yshk>/YshkRbrc                  | 2 | 0 | 2.0                 | N.D. | 3   | 3                | 0   | N.T.      | Confirmed               | N.T. | N.T. | N.T.                    |    |
| 212 | 04198 | B6.129P2-Cxcr4<tm2Tng>                         | 2 | 0 | 2.2                 | N.D. | 3   | 3                | 0   | N.T.      | Confirmed               | N.T. | N.T. | N.T.                    |    |
| 213 | 05685 | C57BL/6N-Oxtr<tm1(KOMP)Vlcg>/AC7               | 2 | 0 | 2.6                 | N.D. | 11  | 11               | 0   | N.T.      | Confirmed               | N.T. | N.T. | N.T.                    |    |
| 214 | 10895 | B6.129S-Gjc1<tm2.3Kni>                         | 2 | 0 | 3.0                 | N.D. | 5   | 5                | 0   | N.T.      | Confirmed               | N.T. | N.T. | N.T.                    |    |
| 215 | 10901 | C57BL/6J-P2rx4<em1Rmur>                        | 2 | 0 | 0.7                 | N.D. | 3   | 3                | 0   | Confirmed | N.T.                    | N.T. | N.T. | N.T.                    |    |
|     |       |                                                |   |   | Maximum length (kb) | 8.0  | 7.0 | 990              | 957 | 33        | 140                     | 143  | 8    | 100                     | 18 |
|     |       |                                                |   |   | Minimum length (kb) | 0.3  | 1.1 | Success rate (%) |     | 96.7      | 291 sites (149 strains) |      |      | 118 sites (103 strains) |    |

Seven strains of yellow highlight are also used in Fig. 2 and Table 2

\*Two PCR fragments are expected to overlap and appeared to be as one band.

\*\*Detection of each loxP or FRT with universal and genomic primers (see Fig. S1)

N.D.: FRT-test was conducted, and products were not detected as expected.

Confirmed: Each loxP or FRT was confirmed by PCR with the universal and specific genomic primers.

N.T.: Each loxP or FRT was not tested by PCR.
