# Supplementary material for: Quick validation of genetic quality for conditional alleles in mice
Source: PubMed Central journal article supplement — Genes Cells. 2021 Feb 26;26(4):240–5. doi: 10.1111/gtc.12834 (PMC8247991; doi:10.1111/gtc.12834), 2021-02-26
Supplement: GTC-26-240-s003.pdf [file GTC-26-240-s003.pdf]

Fig. S2

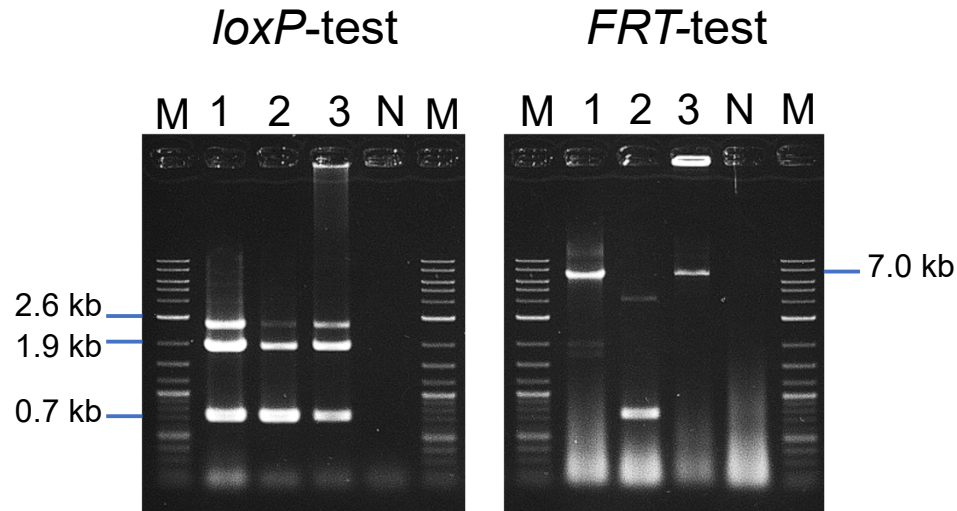

Fig. S2. *loxP*- and *FRT*-tests using genomic DNA extracted by different protocols. Genomic DNA of RBRC05903 C57BL/6N-*Gal<sup>tm1a(KOMP)Wtsi</sup>/G08* mouse extracted from the same size of its tail tip tissue and processed by the following protocols. Lane 1; QIAGEN Dneasy Blood & Tissue kit, Lane 2; alkaline lysis method, and Lane 3; automated DNA isolator (GENE PREP STAR PI-80X, Kurabo, Osaka, Japan) were used for preparation of the template DNA. Lane N; Control genomic DNA extracted from C57BL/6N wild-type mouse tissue by automated DNA isolator. In lanes 1, 3 and N, 100 ng/ $\mu$ l of genomic DNA was applied. In lane 2, one  $\mu$ l of lysis solution was added in the PCR mixture. The PCR reaction was performed using KOD FX polymerase as described in Experimental Procedures.
