# Supplementary material for: Quick validation of genetic quality for conditional alleles in mice
Source: PubMed Central journal article supplement — Genes Cells. 2021 Feb 26;26(4):240–5. doi: 10.1111/gtc.12834 (PMC8247991; doi:10.1111/gtc.12834), 2021-02-26
Supplement: GTC-26-240-s004.pdf [file GTC-26-240-s004.pdf]

Fig. S3

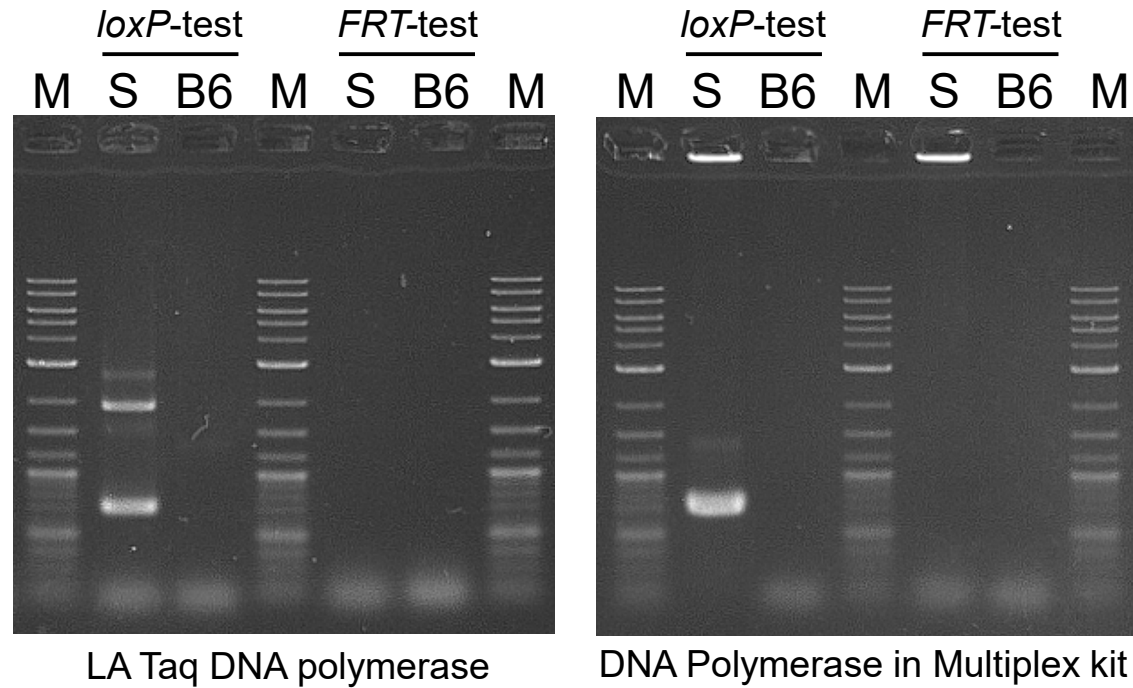

Fig. S3. *loxP*- and *FRT*-tests using different DNA polymerases. A. TaKaRa LA Taq with GC buffer (cat. No. RR02AG) and B. QIAGEN Multiplex PCR kit (Cat. No. 206143) were used to amplify floxed alleles of 0.7, 1.9 and 2.6 kb fragments in *loxP*-test and 7.0 kb fragment in *FRT*-test. Genomic DNA of RBRC05903 C57BL/6N-*Gal<sup>tm1a(KOMP)Wtsi</sup>/G08* mouse extracted by automated DNA isolator (GENE PREP STAR PI-80X, Kurabo, Osaka, Japan) were used as template DNA. PCR reaction was conducted for 40 cycles, with annealing and extension at 60 ° C for 5 min. M: molecular markers.
